# Supplementary material
Source: Springer Nature journal article supplement (https://www.springermedizin.de/resource/supplementary/13024_2014_540_MOESM3_ESM.pdf/9644348)
Supplement: MOESM3 [file 9644348]

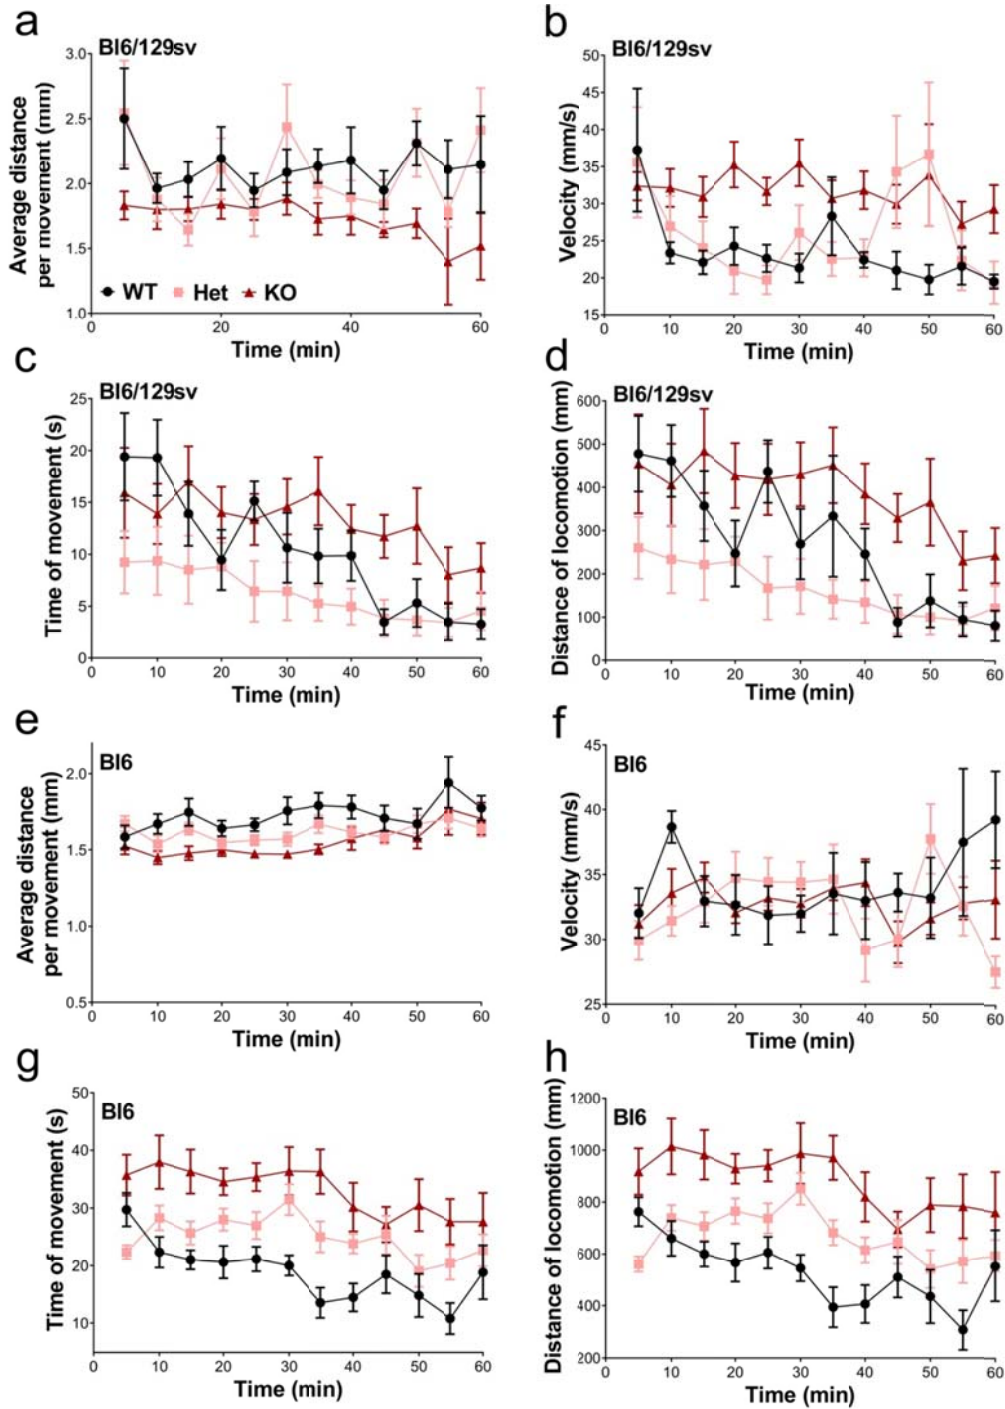

**Figure S3.** Temporal Open field profile. **a-d)** Temporal profile of mice in Bl6 background during the Open field test. **a)** Average distance per movement. **b)** Velocity. **c)** Time of movement. **d)** Distance of locomotion. **e-g)** Temporal profile of mice in Bl6/129sv background during the Open field test. **e)** Average distance per movement. **f)** Velocity. **g)** Time of movement. **h)** Distance of locomotion. n as indicated in **Figure 4**. Data are means  $\pm$  SEM.
